# Supplementary material
Source: PubMed Central journal article supplement (PMC2774786)
Supplement: NIHMS125382-supplement-01.pdf [file NIHMS125382-supplement-01.pdf]

# SUPPORTING INFORMATION

## **A Versatile Photoactivatable Probe Designed to Label the Diphosphate Binding Site of Farnesyl Diphosphate Utilizing Enzymes**

*Olivier Henry<sup>a</sup>, Fernando Lopez-Gallego<sup>b</sup>, Sean A. Agger<sup>b</sup>, Claudia Schmidt-Dannert<sup>b</sup>,  
Stephanie Sen<sup>c</sup>, David Shintani<sup>d</sup>, Katrina Cornish<sup>e</sup> and Mark D. Distefano<sup>a\*</sup>*

*<sup>a</sup>Department of Chemistry, University of Minnesota, 207 Pleasant Street SE,  
Minneapolis, MN 55455*

*<sup>b</sup>Department of Biochemistry, Molecular Biology and Biophysics, University of  
Minnesota, 1479 Gortner Avenue, St. Paul, MN 55108*

*<sup>c</sup>Department of Chemistry, The College of New Jersey, P.O. Box 7718, Ewing, NJ 08628*

*<sup>d</sup>Department of Biochemistry, University of Nevada, Reno, NV 89557*

*<sup>e</sup>Yulex Corporation, 37860 W. Smith-Enke Road, Maricopa, AZ 85238*

*\*Corresponding author. Tel.: 612-624-0544; fax: 612-626-7541.  
E-mail address: diste001@umn.edu*

## Table of Contents

<sup>1</sup>H NMR of Compound **6a**

<sup>1</sup>H NMR of Compound **7a**

<sup>31</sup>P NMR of Compound **7a**

<sup>1</sup>H NMR of Compound **7b**

<sup>31</sup>P NMR of Compound **7b**

<sup>1</sup>H NMR of Compound **8a**

<sup>31</sup>P NMR of Compound **8a**

<sup>1</sup>H NMR of Compound **8b**

<sup>31</sup>P NMR of Compound **8b**

<sup>1</sup>H NMR of Compound **4a**

<sup>31</sup>P NMR of Compound **4a**

HPLC of Compound **4a**

HR ESI MS of Compound **4a**

<sup>1</sup>H NMR of Compound **4b**

<sup>31</sup>P NMR of Compound **4b**

HPLC of Compound **4b**

HR ESI MS of Compound **4b**

Stereo Pictures of **4b** Bound to FPP-Utilizing Enzymes

Table of Residues within 4 Å of Distal Phosphate (FPP) or Phosphonate (**4b**)

Oh-3-49  
 University of Minnesota  
 Department of Chemistry  
 VAC-300

exp1 std1h  
 SAMPLE 7 2008  
 date NOV  
 solvent CDCl3  
 file /O1d/W9/mddon~  
 h/081107V3\_3202  
 ACQUISITION  
 strq 299.956  
 tn H1  
 at 2.000  
 mp 23996  
 sw 5998.8  
 fb 3400  
 bs 16  
 tpwr 63  
 pw 5.3  
 dl 1.500  
 tof 1318.0  
 gain 16  
 alock Y  
 flags not used  
 11 n  
 1n n  
 dp y  
 hs nn  
 SP DISPLAY -13.8  
 WP 2474.5  
 VS 55  
 SC 0  
 WC 225  
 hzmm 11.00  
 IS 855.73  
 rfi 599.8  
 th 0  
 ins 6  
 al cdc ph 2.000

7.84  
 7.838  
 7.832  
 7.814  
 7.810  
 7.805  
 7.794  
 7.787  
 7.782  
 7.732  
 7.727  
 7.722  
 7.706  
 7.702  
 7.697  
 7.628  
 7.624  
 7.608  
 7.606  
 7.599  
 7.579  
 7.575  
 7.511  
 7.507  
 7.498  
 7.490  
 7.486  
 7.480  
 7.462  
 7.459  
 7.454  
 7.429  
 5.274  
 4.525

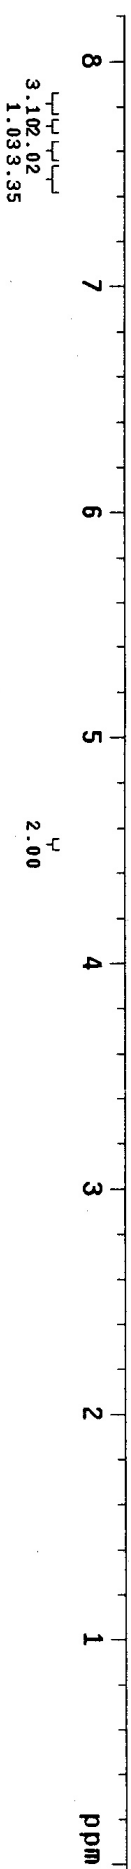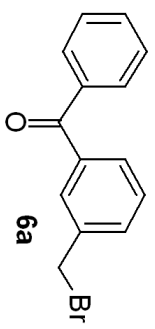

oh-benzo-meta-  
University of  
Department of  
VAC-300

expt std/h

SAMPLE  
date Nov 14 20  
solvent CDC  
file /net/vacc300  
xport/home/data/  
donh/061114v3\_44  
ACQUISITION  
sfrq 299.9  
in 11  
at 2.0  
mp 239  
sw 5998  
fb 34  
bs 6  
tpwr 513  
pw 1.500  
di 1316.0  
tof 16  
nt 16  
ct 16  
atlock Y  
gain not used  
FLAGS  
l1 n  
l2 n  
l3 n  
l4 y  
hs nm  
SP -5.0  
WD 2395.8  
VS 46  
SC 0  
WC 225  
hzmm 10.65  
ls 79.83  
rfl 599.8  
th 0  
ins 3  
ai cdc ph 2.000

DEC 8 VI  
299.954  
0.10  
1.0  
200  
ft  
65536  
7  
react  
procp1ot  
werr  
wexp  
wds  
wnt

7.999  
7.978  
7.974  
7.971  
7.967  
7.965  
7.966  
7.970  
7.964  
7.966  
7.982  
7.975  
7.962  
7.958  
7.953  
7.947  
7.934  
7.928  
7.926  
7.924  
7.922  
7.498  
7.496  
7.491  
7.475  
7.470  
7.465  
7.446  
7.443  
7.431  
7.406  
3.738  
3.709  
3.701  
3.678  
3.673  
3.252  
3.180

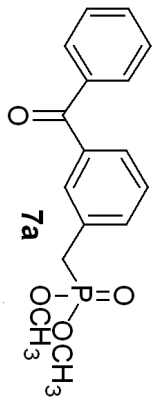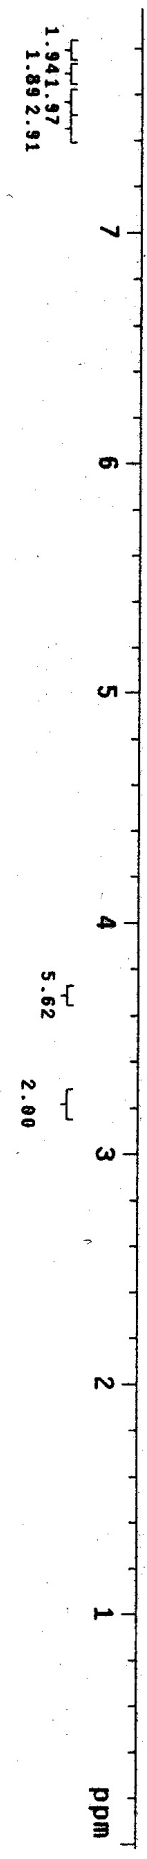

oh-benzo-meta-methyl-ester  
 University of Minnesota  
 Department of Chemistry  
 VAC-300

28.656

exptl s2put1

SAMPLE DEC. 4 VT 299.954  
 date Nov 14 2008 dfreq H1  
 solvent CDC13 dn  
 file /net/vac300/e~ dpwr 40  
 xport/home/data/md~ dof 0  
 donh/081114v3 4404 dm nvy  
 ACQUISITION dmw v  
 sfrq 121.432 dmw 7233  
 tn P31 dsrq  
 at 0.880 dres 1.0  
 np 68012 hnmw PROCESSING n  
 sw 42508.0 lb hnmw 1.50  
 fb 23409 1b wfile  
 bs 68 pproc  
 tpwr 26.2 fn 131072 ft  
 pw 1.000 math  
 d1 1.908 wefr react  
 d2 9017.7 wefr procpilot  
 tof .32 wos  
 nt 32 wnt  
 ct gain not used  
 alock n  
 flags n  
 fl n  
 in n  
 dp y  
 hs yn  
 DISPLAY  
 sp -6012.7  
 wp 12144.8  
 vs 22  
 sc 0  
 wc 225  
 hzmm 53.98  
 is 1621.74  
 rfi 10069.3  
 rfp -2076.1  
 th 70  
 ins 100.000  
 ai no ph

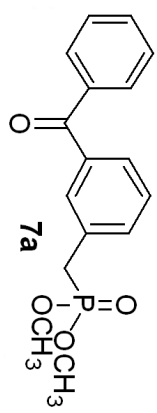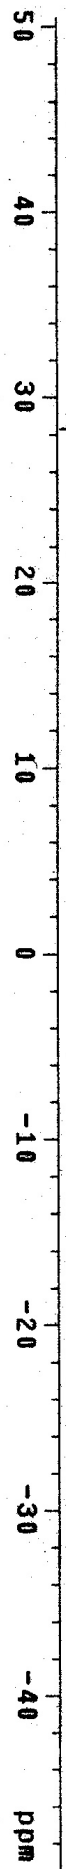

oh-3-37  
 University of Minnesota  
 Department of Chemistry  
 VAC-300

exp1 std1h

SAMPLE  
 date Mar 18 2008  
 solvent CDC13  
 file /01d/k2/mdon~  
 h/080318v3\_2702  
 ACQUISITION  
 sfrq 299.956  
 tn H1  
 at 2.000  
 np 23996  
 sw 5998.8  
 fb 3400  
 bs 18  
 tpwr 63  
 pw 5.3  
 dl 1.500  
 tof 1318.0  
 nt 16  
 ct 16  
 alock Y  
 gain not used  
 flags not used  
 i1 n  
 in n  
 dp Y  
 hs nm  
 DISPLAY  
 sp 12.4  
 wp 2422.0  
 vs 87  
 sc 0  
 wc 225  
 hzmm 10.76  
 is 826.17  
 rfl 599.8  
 rfp 0  
 th 4  
 ins 4  
 ai cdc ph 2.000

| Chemical Shift (ppm) | Integration | Phase | Waltz | React | Procplot |
|----------------------|-------------|-------|-------|-------|----------|
| 7.344                | 0.10        | f     |       |       |          |
| 7.352                | 0.10        | f     |       |       |          |
| 7.359                | 0.10        | f     |       |       |          |
| 7.372                | 0.10        | f     |       |       |          |
| 7.381                | 0.10        | f     |       |       |          |
| 7.384                | 0.10        | f     |       |       |          |
| 7.389                | 0.10        | f     |       |       |          |
| 7.402                | 0.10        | f     |       |       |          |
| 7.408                | 0.10        | f     |       |       |          |
| 7.412                | 0.10        | f     |       |       |          |
| 7.429                | 0.10        | f     |       |       |          |
| 7.434                | 0.10        | f     |       |       |          |
| 7.435                | 0.10        | f     |       |       |          |
| 7.489                | 0.10        | f     |       |       |          |
| 7.493                | 0.10        | f     |       |       |          |
| 7.498                | 0.10        | f     |       |       |          |
| 7.518                | 0.10        | f     |       |       |          |
| 7.542                | 0.10        | f     |       |       |          |
| 7.694                | 0.10        | f     |       |       |          |
| 7.696                | 0.10        | f     |       |       |          |
| 7.704                | 0.10        | f     |       |       |          |
| 7.709                | 0.10        | f     |       |       |          |
| 7.716                | 0.10        | f     |       |       |          |
| 7.722                | 0.10        | f     |       |       |          |
| 7.725                | 0.10        | f     |       |       |          |
| 7.732                | 0.10        | f     |       |       |          |
| 7.736                | 0.10        | f     |       |       |          |
| 3.666                | 1.0         | n     |       |       |          |
| 3.630                | 1.0         | n     |       |       |          |
| 3.623                | 1.0         | n     |       |       |          |
| 3.230                | 1.0         | n     |       |       |          |
| 3.156                | 1.0         | n     |       |       |          |

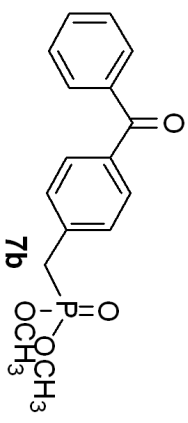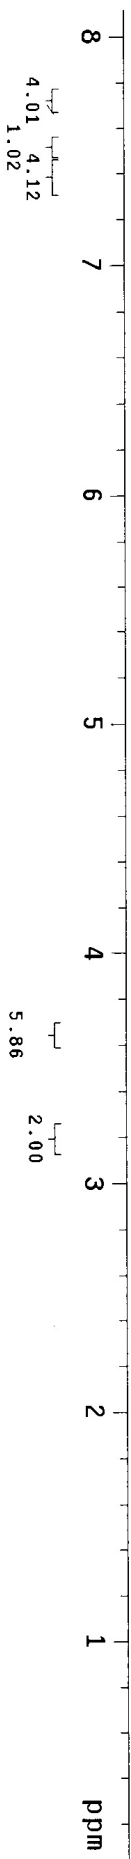

oh-3-37  
 University of Minnesota  
 Department of Chemistry  
 VAC-500

expt 52901

SAMPLE DEC. 6 VT 289.954  
 date Mar 15 2008  
 solvent CDCl3  
 file /014/42/...  
 h/08033443...  
 ACQUISITION  
 sfrq 121.492  
 tn 431  
 nt 4.898  
 np 88812  
 sv 42505.0  
 fb 29480  
 be 18  
 lgvr 59  
 pw 28.2  
 d1 1.000  
 d2 1.390  
 kof 817.7  
 nt 32  
 ct 32  
 atock n  
 gain not used  
 flags n  
 11 n  
 1n n  
 4p y  
 hs y/n  
 DISPLAY  
 sd -6196.6  
 wd 12062.5  
 vs 7  
 sc 0  
 wc 225  
 hzmm 53.70  
 15 1547.79  
 rf1 10064.3  
 rfb -2078.1  
 ch 48  
 line 100.000  
 al no ph

PROCCESSING 1.59  
 react  
 plot

28.285

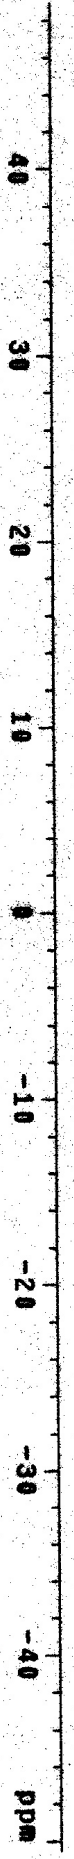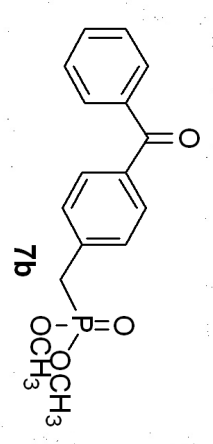

oh-meta-phosphonate  
 University of Minnesota  
 Department of Chemistry  
 VAC-300

expi stdlh

SAMPLE Dec 15 2008  
 solvent GD30D  
 file /net/vac300/er  
 xport/home/data/md-  
 donh/081215V3\_1603  
 ACQUISITION  
 sfreq 299.957  
 tn H1  
 at 2.000  
 np 23396  
 sw 5998.8  
 fb 3400  
 bs 16  
 tpwr 63  
 pw 5.3  
 dl 1.500  
 tof 1318.0  
 nt 16  
 ct Wexp  
 atlock Y  
 gain not used  
 wnt

DEC 8 VT 299.956  
 H1  
 30  
 0  
 nmh  
 C  
 200  
 n  
 1.0  
 hmo  
 0.10  
 wf file  
 proc 65536  
 fn f  
 math  
 react  
 procpilot

11 n  
 in n  
 dp y  
 hs nm  
 DISPLAY 4.7  
 SP 2425.5  
 WD 148  
 VS 0  
 SC 225  
 WC 10.78  
 hzmm 792.46  
 is 599.8  
 ffl 0  
 rfp 8  
 th 8  
 ins cdc ph 2.000

5.348

3.212  
 3.140

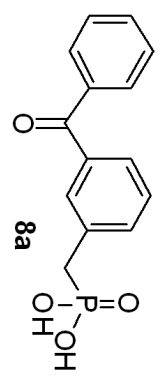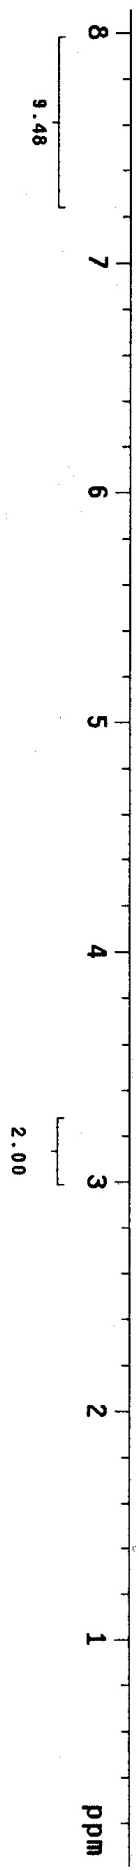



oh-meta-phosphonate  
 University of Minnesota  
 Department of Chemistry  
 VAC-300

24.423

expt1 s2pu1

|             |                |            |           |         |
|-------------|----------------|------------|-----------|---------|
| date        | Dec 15 2008    | dfreq      | DEC. & VT | 299.956 |
| solvent     | CD3OD          | dn         | H1        |         |
| file        | /net/vac300/er | dpwr       | 40        |         |
| xport       | /home/data/md~ | dof        | 0         |         |
| donh        | /081215V3_1604 | dm         | nyy       |         |
| ACQUISITION |                | dmf        | y         |         |
| sfrq        | 121.433        | dmf        | 7233      |         |
| ln          | P31            | dseq       |           |         |
| at          | 0.800          | dres       | 1.0       |         |
| np          | 68012          | homo       | n         |         |
| sw          | 42508.0        | PROCESSING |           |         |
| fb          | 23400          | lb         | 1.50      |         |
| bs          | 16             | wfitle     |           |         |
| lpwr        | 60             | proc       |           |         |
| pw          | 26.2           | fn         | 131072    |         |
| d1          | 1.000          | meth       | f         |         |
| d2          | 1.900          | werf       | react     |         |
| tof         | 9017.7         | wexp       | procplot  |         |
| nt          | 32             | wbs        |           |         |
| ct          | 32             | wnt        |           |         |
| atlock      | n              |            |           |         |
| gain        | not used       |            |           |         |
| flags       |                |            |           |         |
| l1          | n              |            |           |         |
| l2          | n              |            |           |         |
| l3          | y              |            |           |         |
| hs          | yn             |            |           |         |

DISPLAY

|      |         |
|------|---------|
| SP   | -5950.5 |
| WP   | 11897.0 |
| VS   | 59      |
| SC   | 0       |
| WC   | 225     |
| h2mm | 52.88   |
| IS   | 2227.45 |
| FFI  | 10069.3 |
| FFP  | -2078.1 |
| th   | 2       |
| ims  | 100.000 |
| ai   | no      |
| ph   |         |

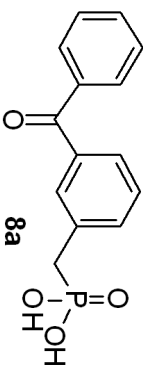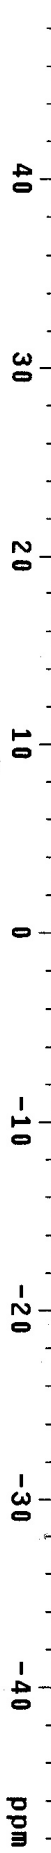

Oh-1-98  
 University of Minnesota  
 Department of Chemistry  
 VAC-300

exptl statth

SAMPLE  
 date Apr 29 2005  
 solvent CDC13  
 file /old/j4/madon-  
 h/050429V3\_0302  
 ACQUISITION  
 sfrq 299.956  
 in H1  
 at 2.000  
 np 23996  
 sw 5998.8  
 fb 3400  
 bs 16  
 tpwr 63  
 pw 19.7  
 di 1.500  
 tof 1318.0  
 nt 16  
 ct 16  
 atlock Y  
 gain not used  
 flags Y  
 11 n  
 in n  
 dp Y  
 hs nm  
 DISPLAY  
 sp 38.8  
 wp 2986.7  
 vs 0  
 sc 0  
 wc 225  
 hzmm 10.61  
 is 1031.41  
 rff1 599.8  
 th 0  
 ins 10  
 ai cdc ph 2.000

4.99  
 7.612  
 7.529  
 7.409  
 7.383  
 7.314  
 7.291  
 DEC & VT  
 299.954  
 H1  
 30  
 0  
 mm  
 C  
 200  
 1.0  
 n  
 hom  
 PROCESSING  
 0.10  
 1b  
 wtfile  
 19.7  
 proc  
 fn  
 65536  
 math  
 f  
 react  
 procpilot  
 wnt

3.681

Dioxane

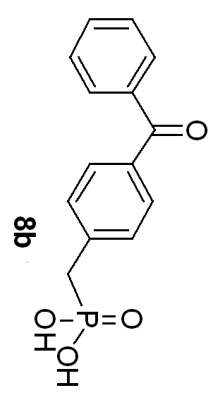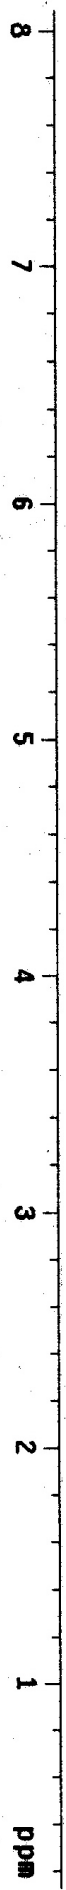

4.30 2.24  
 1.212.17

2.00

expt1 s2pu1

```

SAMPLE      DEC. & VT
date      Apr 29 2005      dfrq      299.954
solvent    CDCl3          dn         H1
file      /O1d/j4/mddon~  dpwr      40
h/050429v3_0304          dof        0
ACQUISITION              dm         nyy
                          dmm         w
sfrq       121.432        dmf         v
tn         P31           dres      7233
at         0.800         dseq     1.0
np         68012         dres     1.0
sw         42508.0      homo     n
fb         23400        PROCESsing 1.50
bs         16          lb
tpwr       60          wtfile
pw         26.2        proc
d1         1.000       fn         131072
d2         1.900       math
tof        9017.7
nt         32         wefr
ct         32         wexp
alock      not used   wnt
gain       n
          flags
il         n
in         n
dp         y
hs         yn
          DISPLAY
sp         -5950.5
wp         12082.5
vs         7.1
sc         0
wc         225
hzzmm     53.70
is         1584.71
rfl       10069.3
rftp     -2078.1
th         4
ins       100.000
al         no ph

```

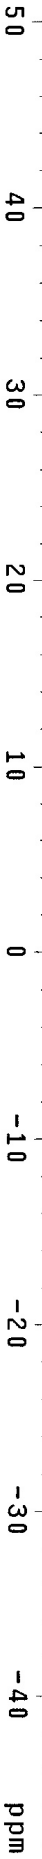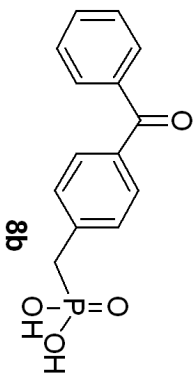

STANDARD PROTON PARAMETERS

Pulse Sequence: s2pul

Solvent: D2O

Temp. 25.0 C / 298.1 K

Operator: Ianevich

File: OH\_B

INOVA-500 "Inova5001"

Pulse 61.7 degrees

Acq. time 1.892 sec

Width 8000.0 Hz

16 repetitions

OBSERVE H1, 499.7831472 MHz

DATA PROCESSING

FT size 32768

Total time 0 min, 30 sec

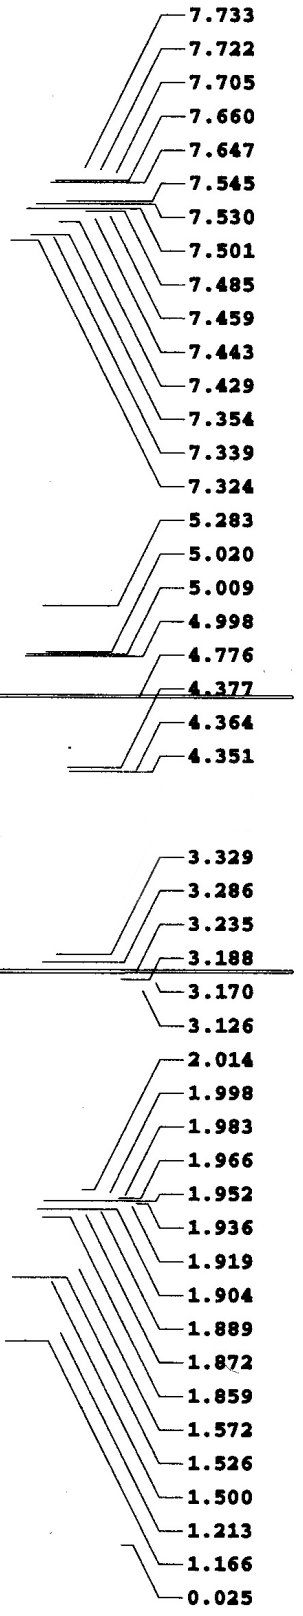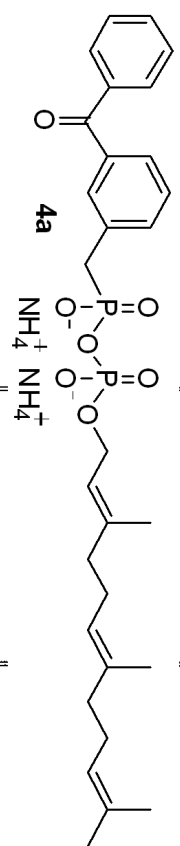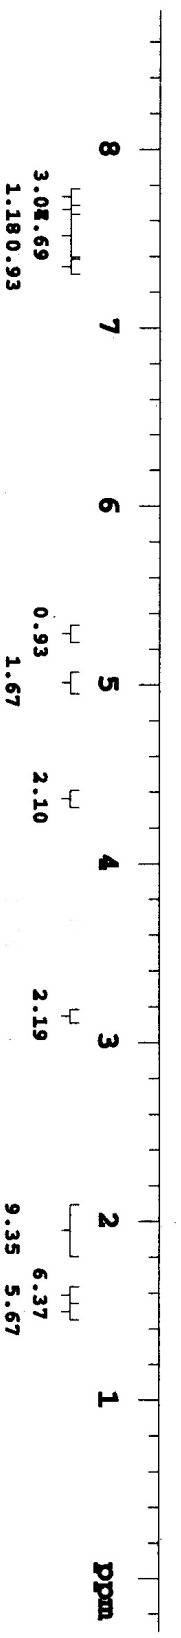

31P SENSITIVITY  
0.0485 M TRIPHENYLPHOSPHATE  
S/N 255/1

Pulse Sequence: s2pul

Solvent: CD3OD  
Temp. 25.0 C / 298.1 K  
Operator: Ienevich  
File: OH\_B\_31P  
INOVA-500 "Inova5001"

Relax. delay 2.000 sec  
Pulse 90.0 degrees  
Acq. time 2.000 sec  
Width 20000.0 Hz  
256 repetitions  
OBSERVE P31, 202.3159351 MHz  
DECOUPLE H1, 499.7854255 MHz  
Power 44 dB  
continuously on  
GARP-1 modulated  
DATA PROCESSING  
Line broadening 2.0 Hz  
FT size 131072  
Total time 17 min, 6 sec

11.558

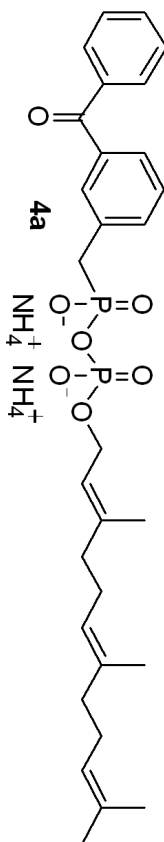

10.361

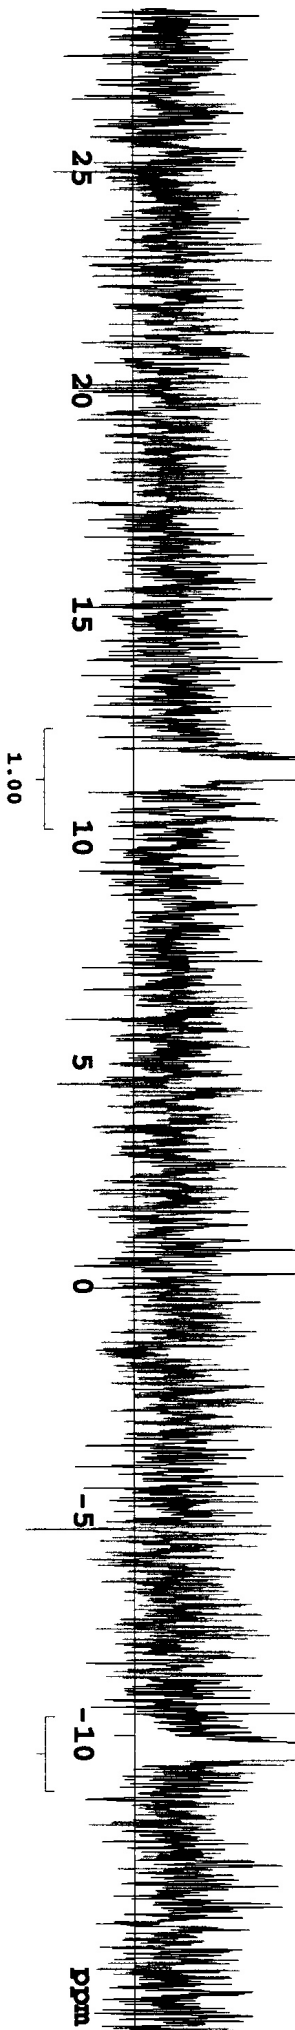

1.04

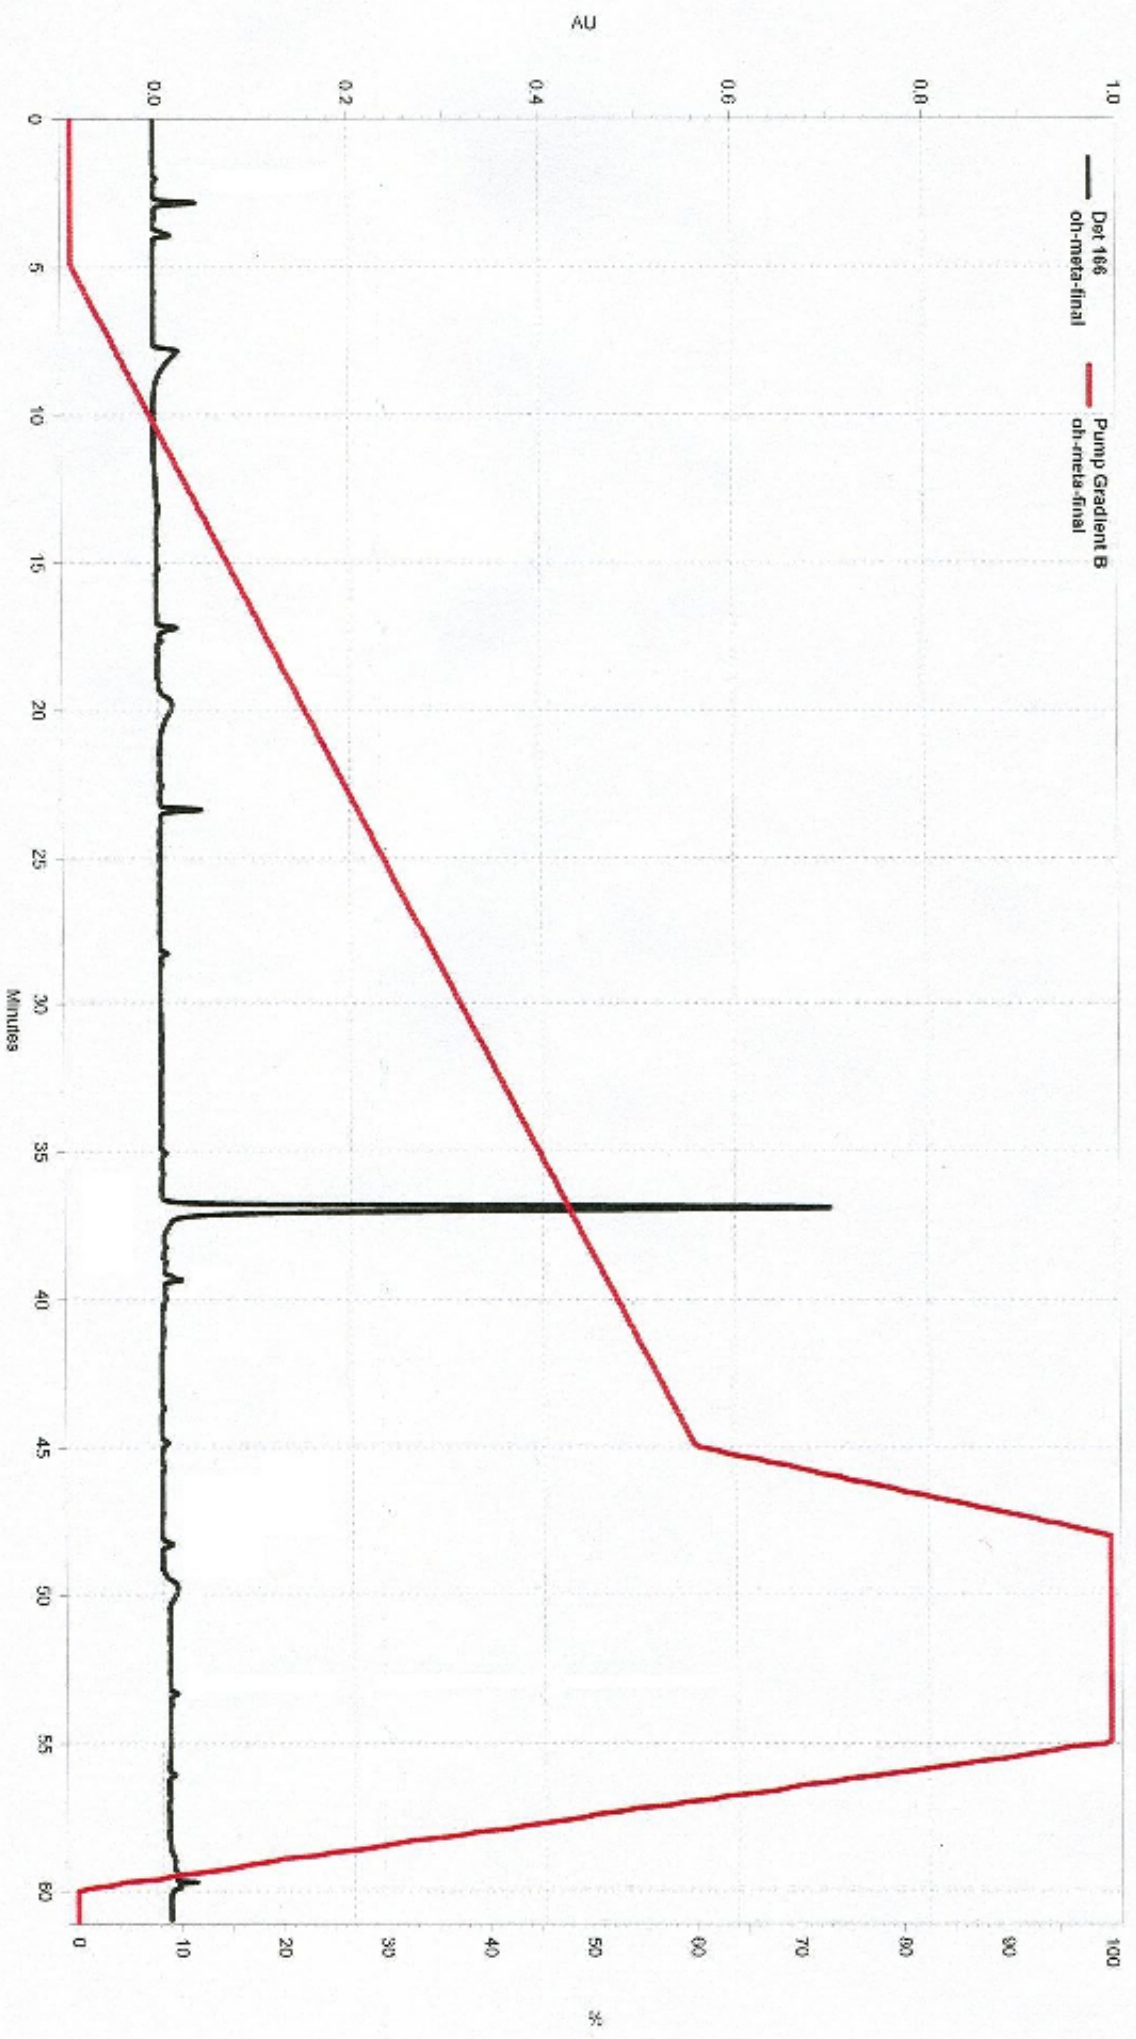

D:\32Karat\Projects\Default\2009\OH\oh-meta-final, Det 166

D:\32Karat\Projects\Default\2009\OH\oh-meta-final, Pump Gradient B

# Display Report

Analysis Name 9.d  
Sample Name 71020  
Comment coupling-metahr-rms

Acquisition Date 3/31/2006 3:02:24 PM  
Method negative.tofpar

Operator  
Instrument

operator name  
BiTOF II

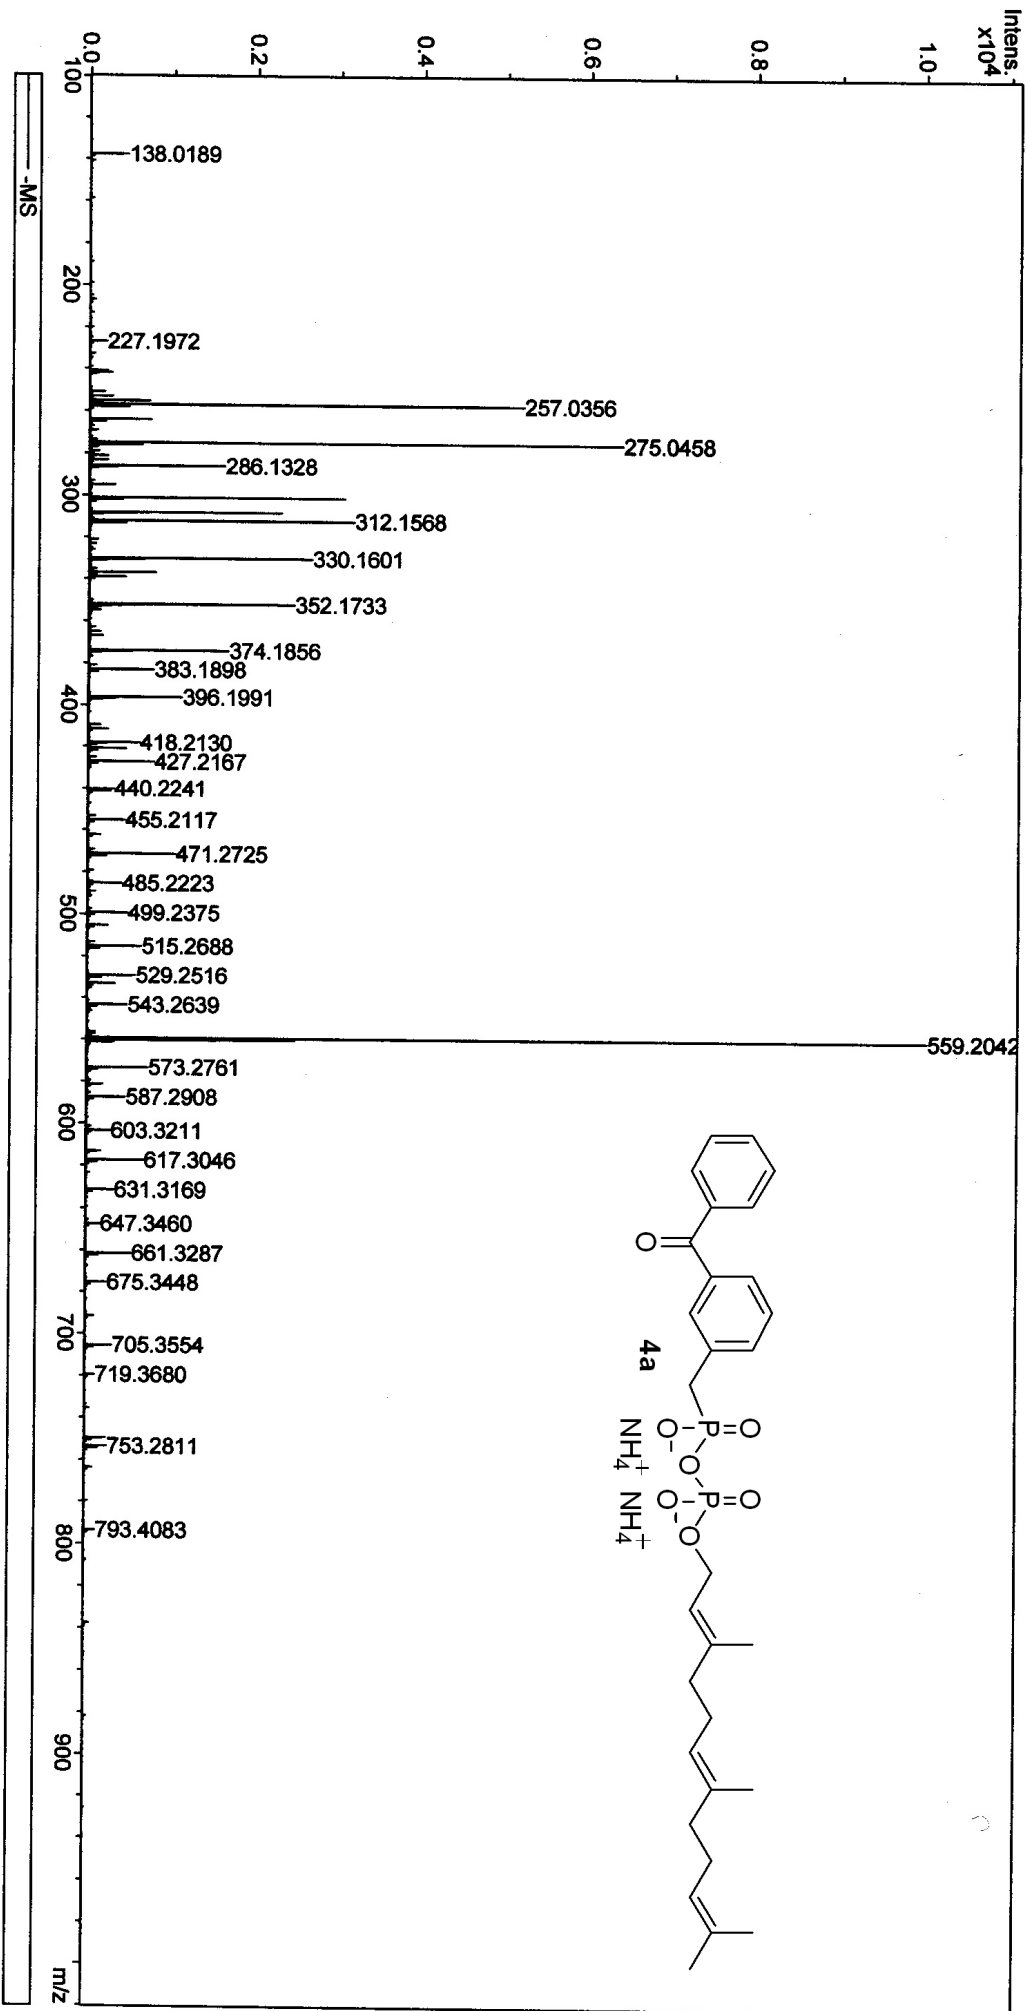

Oh-1-87  
 University of Minnesota  
 Department of Chemistry  
 VAC-500

exp1 stain  
 SAMPLE  
 date May 23 2005  
 solvent CDC13  
 file /018/14/Modor  
 h/050533V3\_0202  
 ACQUISITION  
 sfrq 299.955  
 tn H1  
 at 2.800  
 np 23996  
 sv 5388.8  
 fb 3480  
 bs 16  
 ipwr 69  
 pw 10.7  
 di 1.580  
 lof 1518.0  
 nt 16  
 ct 16  
 atlock Y  
 gain not used  
 flags WRT  
 n n  
 n n  
 y Y  
 nm nm  
 DISPLAY  
 sp -5.0  
 wp 2395.8  
 vs 662  
 sc 0  
 wc 225  
 hzmm 10.65  
 is 1720.85  
 rfl 589.8  
 rfp 0  
 th 2  
 ins 2.000  
 ai cdc ph  
 EC & VT 299.954  
 H1 H1  
 30 30  
 0 0  
 nmp C  
 200  
 1.0  
 n  
 PROCESSING 0.10  
 ft  
 65536  
 f  
 react  
 procpilot

- 7.537
- 7.513
- 7.508
- 7.479
- 7.408
- 7.380
- 7.384
- 7.377
- 7.359
- 7.287
- 7.276
- 7.260
- 7.235
- 5.133
- 5.111
- 5.081
- 4.848
- 4.837
- 4.285
- 4.269
- 4.140
- 4.120
- 4.088
- 3.129
- 3.124
- 3.118
- 3.113
- 3.107
- 3.039
- 2.859
- 1.822
- 1.801
- 1.782
- 1.744
- 1.727
- 1.717
- 1.695
- 1.435
- 1.397
- 1.359
- 1.340

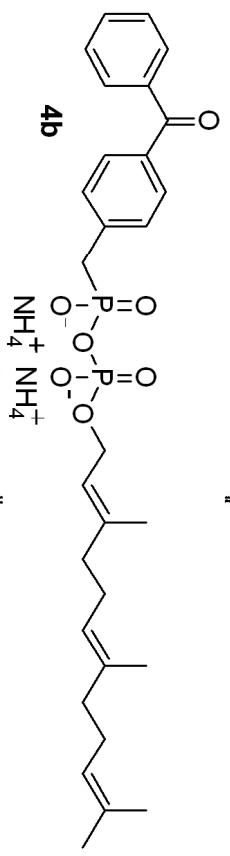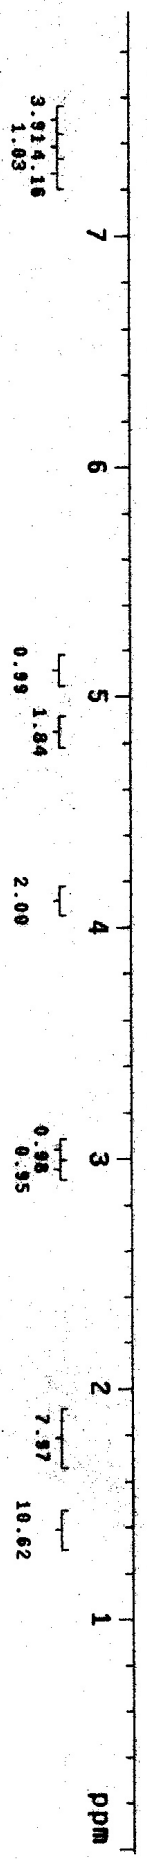



oh-1-97  
 University of Minnesota  
 Department of Chemistry  
 VAC-300

exp1 s2pu1

SAMPLE May 23 2005 dfreq 299.954  
 solvent CDC13 dn H1  
 file /o1d/14/mddon~ dpwr 40  
 h/050523V3\_0204 dof 0  
 ACQUISITION nyy w  
 sfreq 121.432 dmm 7233  
 tn P31 dmf  
 at 0.800 dseq  
 np 68012 dres 1.0  
 sw 42508.0 homo  
 fb 23400  
 bs 16 lb  
 tpwr 60 wtfile 1.50  
 pw 26.2 proc ft  
 dl 1.000 fn 131072  
 d2 1.900 math f  
 tof 9017.7  
 nt 32 wert  
 ct 32 wexp  
 atock n wbs  
 gain not used wrt  
 FLAGS  
 i1 n  
 in n  
 dp y  
 hs yn  
 DISPLAY  
 sp -6110.7  
 wp 12162.3  
 vs 231  
 sc 0  
 wc 225  
 hzmm 54.05  
 is 68601.40  
 rfi 10069.3  
 rfp -2078.1  
 th 63  
 lns 100.000  
 ai no ph

12.275  
 12.062

9.546  
 9.755

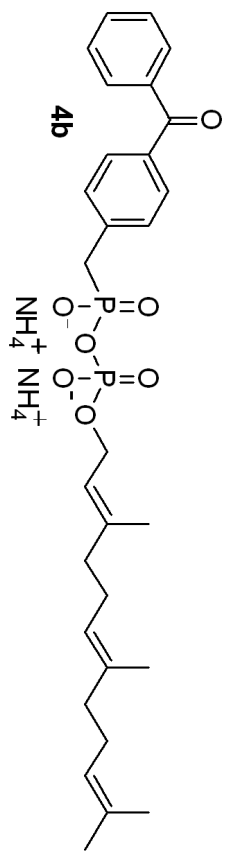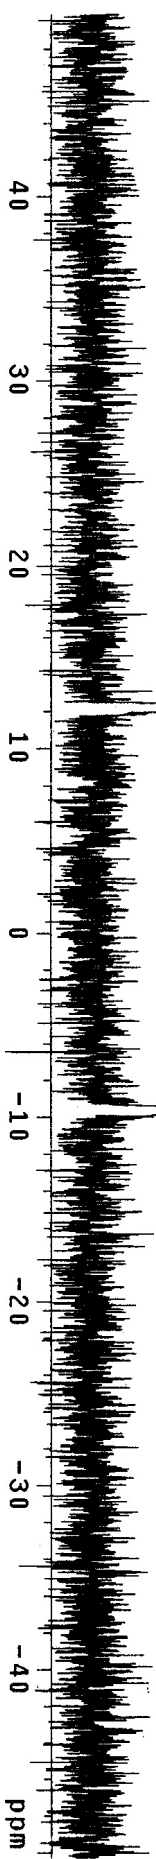

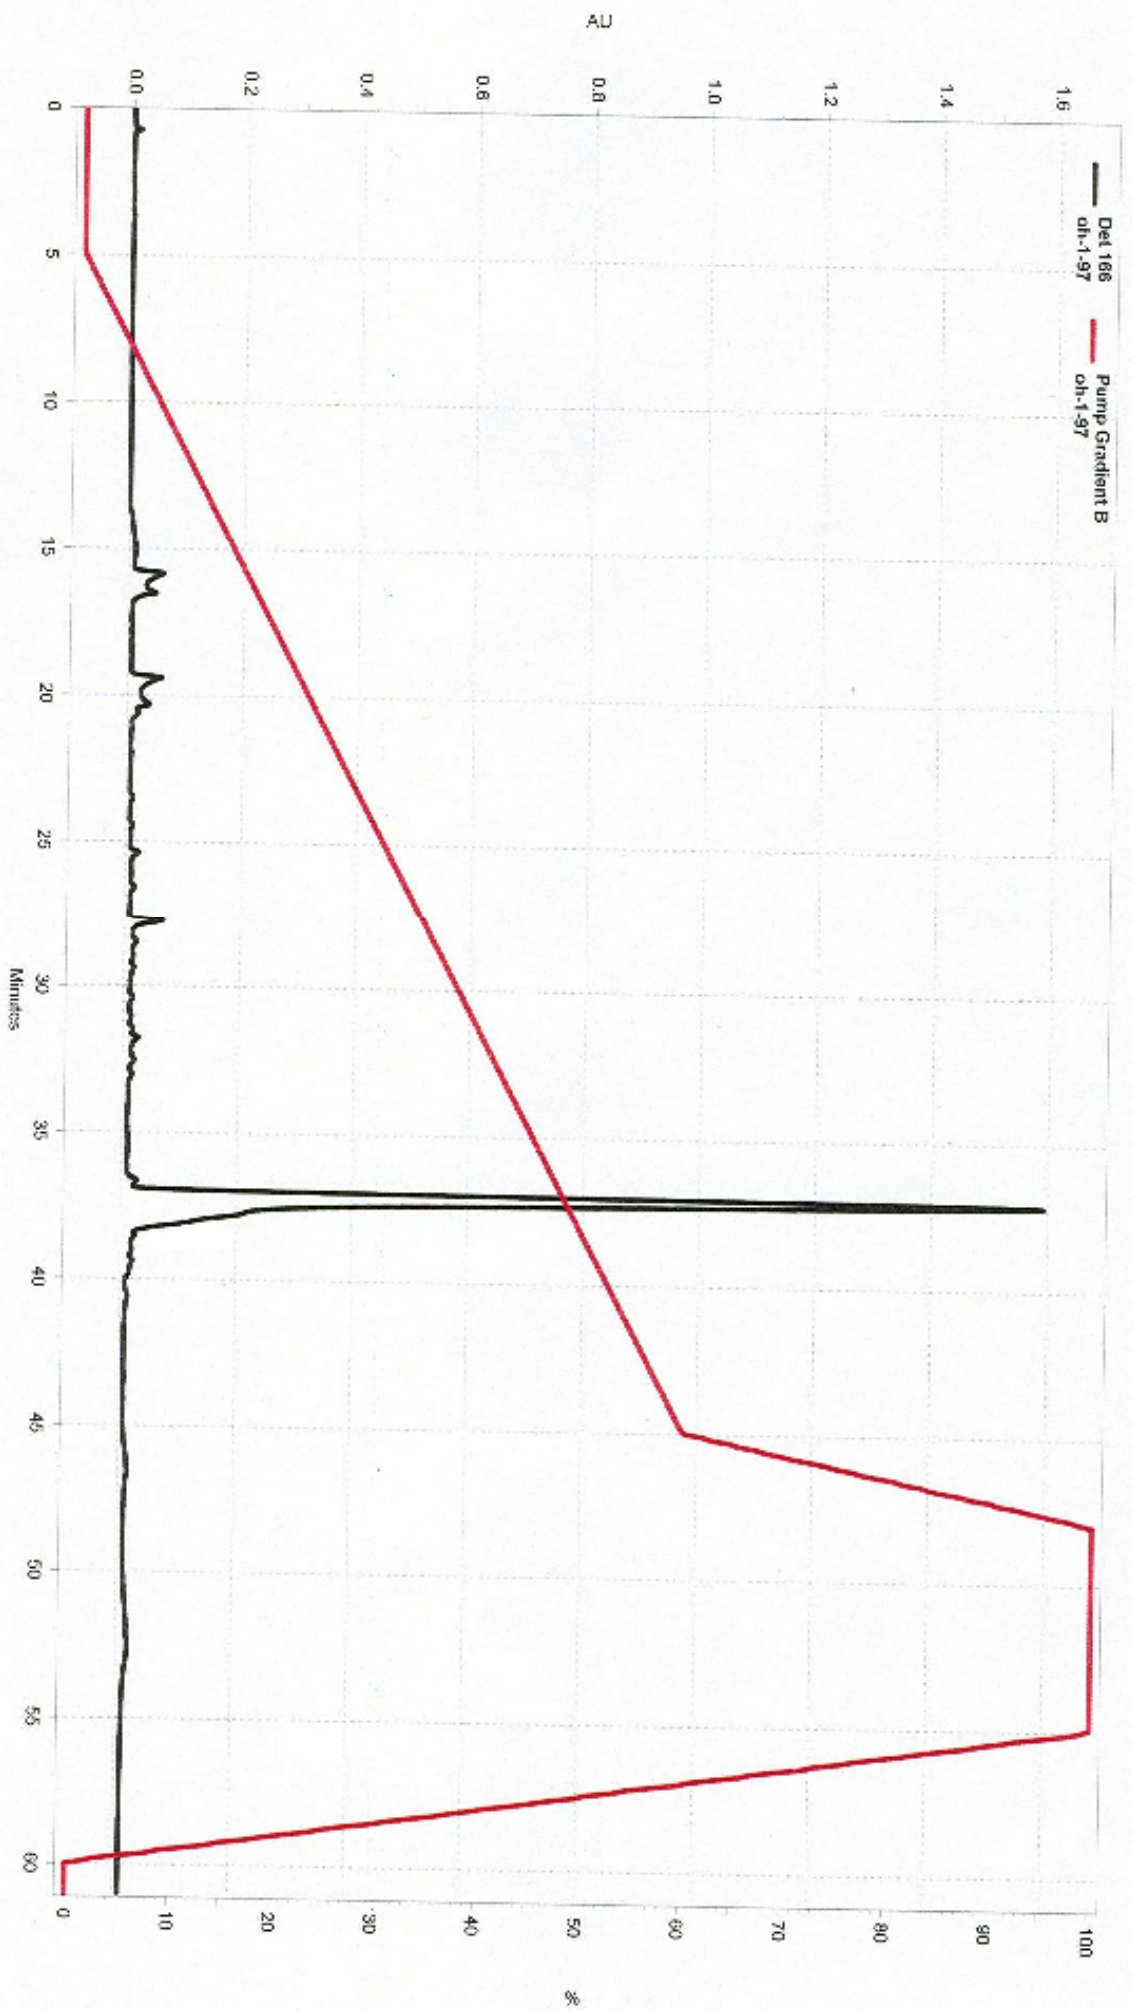

D:\32Karath\Projects\Default\2008\OH\oh-1-97\12-11-2008 5-27-50 PM, Det 166

D:\32Karath\Projects\Default\2008\OH\oh-1-97\12-11-2008 5-27-50 PM, Pump Gradient B

# Display Report

Analysis Name 8.d  
Sample Name 71011  
Comment OH-1-97PEG

Acquisition Date 3/30/2006 3:43:51 PM  
Method negative:tofpar

Operator

Operator name  
BIO TOF II

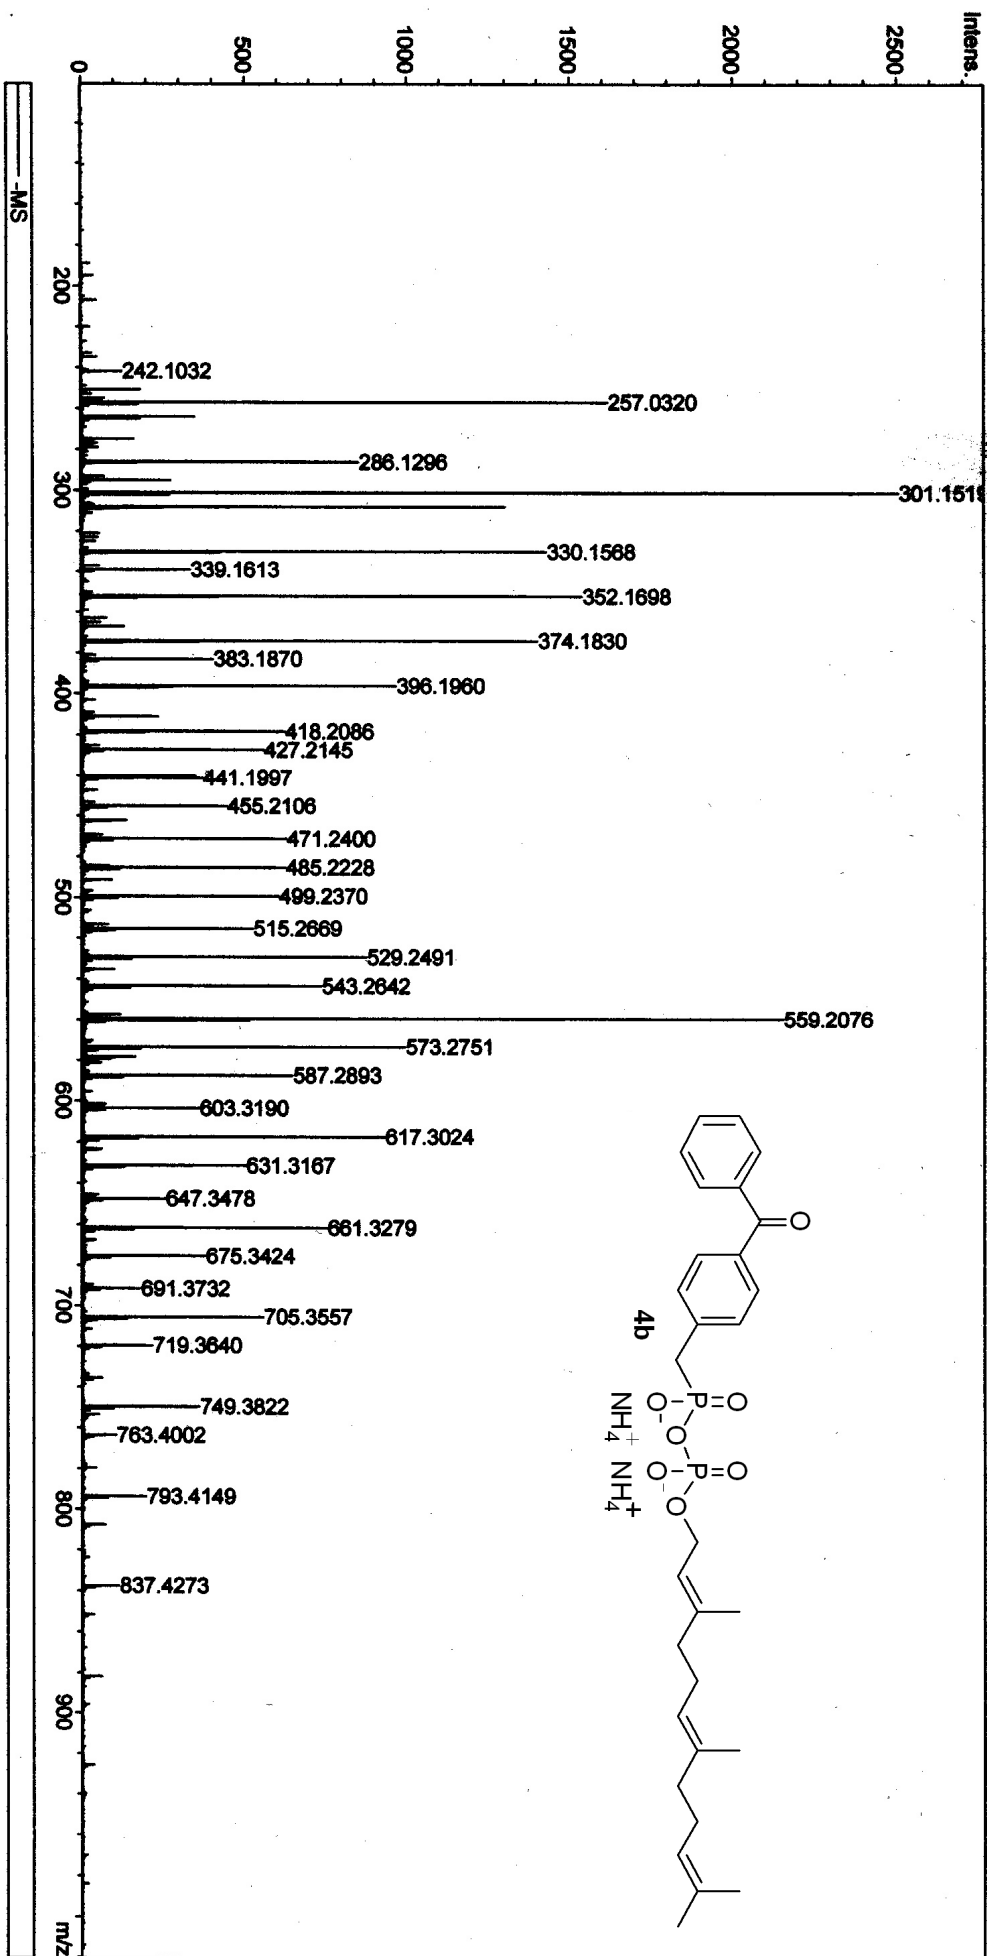

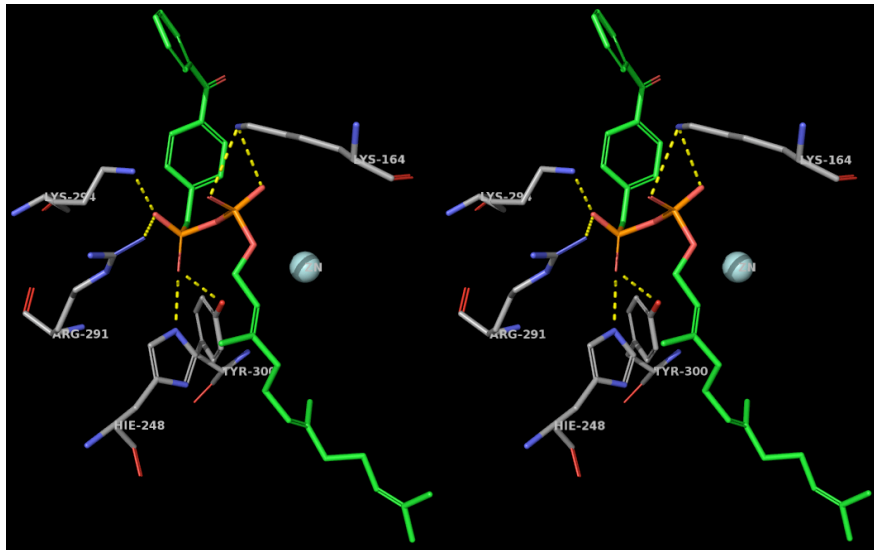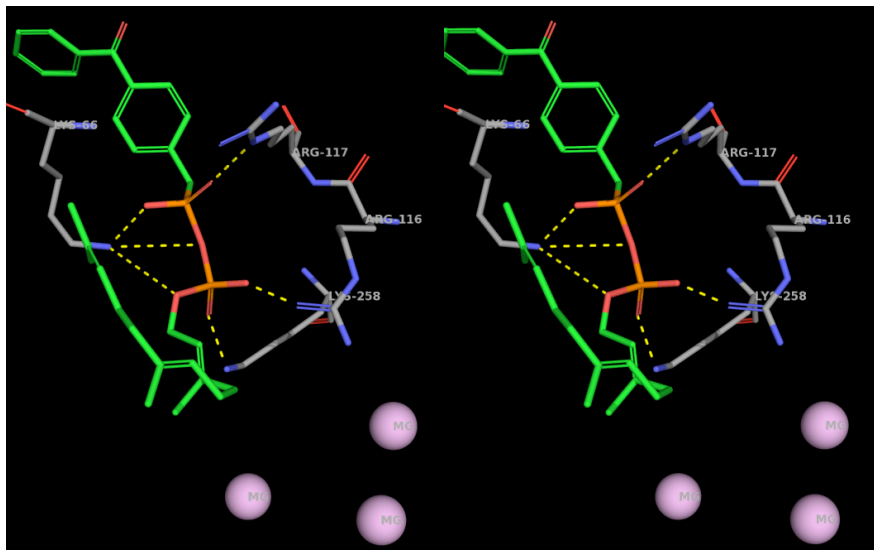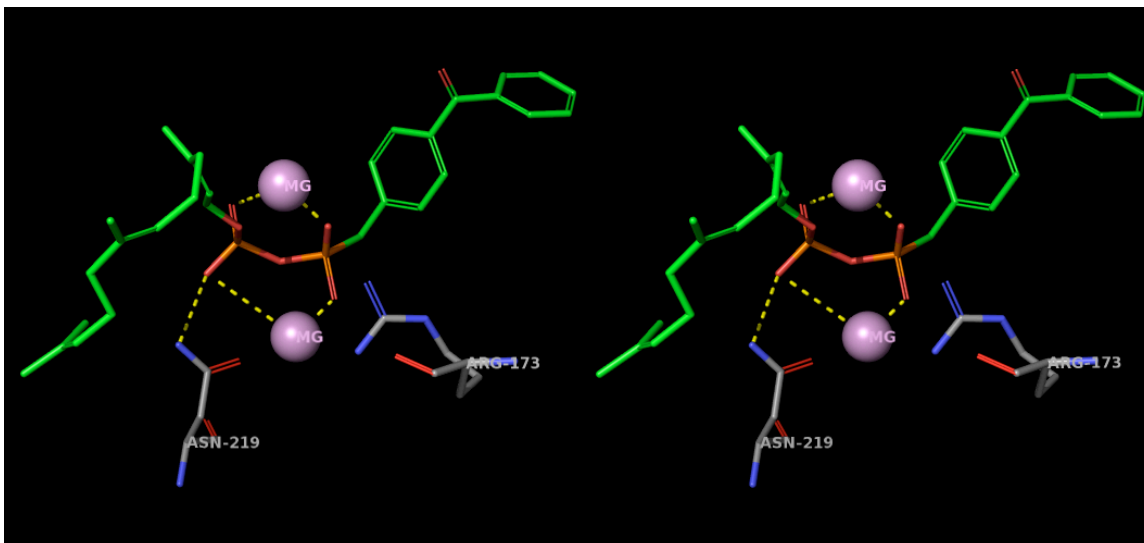

**Figure.** Modeling of **4b** in the active sites of FPP-utilizing enzymes. This Figure contains stereo views of the pictures shown in Figure 8 in the text. Only the Enzyme•4b complexes are shown. These correspond to the pictures on the right side in Figure 8 (Top Right, Middle Right and Bottom Right). The legend from Figure 8 is reprinted below.

**Figure 8.** Modeling of **4b** in the active sites of FPP-utilizing enzymes. Top Left: Crystal structure of NrPFTase (1JCR) with bound FPP. Shown, are residues H248 $\beta$ , R291 $\beta$ , K294 $\beta$ , Y300 $\beta$ , K164 $\alpha$  (colored by element; carbon in grey), FPP (colored by element; carbon in green) and Zn (cyan). The yellow dashes illustrate potential hydrogen bonding or electrostatic interactions (within 4Å) of the distal phosphate. Top Right: Crystal structure of NrPFTase with **4b** built on the bound FPP. The color scheme is the same as that for Top Left. Middle Left: Crystal structure of EcFPPSase (1RQ1) with FPP built by modifying the existing bound IPP. Shown, are residues K66, R116, R117, K258 (colored by element; carbon in grey), FPP (colored by element; carbon in green) and Mg (purple). The yellow dashes illustrate potential hydrogen bonding or electrostatic interactions (within 4Å) of the distal phosphate. Middle Right: Crystal structure of EcFPPSase with **4b** built on the bound IPP. The color scheme is the same as that for Middle Left. Bottom Left: Crystal structure of StSTSase (Pentalenene synthase, 1PS1) with FPP docked in the active site of the enzyme. Shown, are residues R173, N219 (colored by element; carbon in grey), FPP (colored by element; carbon in green) and Mg (purple). The yellow dashes illustrate potential hydrogen bonding or electrostatic interactions (within 4Å) of the distal phosphate. Bottom Right: Crystal structure of StSTSase with **4b** docked in the active site of the enzyme. The color scheme is the same as that for Bottom Left.

Residues within 4 Å of the distal phosphate (FPP) or phosphonate (**4b**)**RnPFTase**

| Ligand | Residue              | Dist in Å | Ligand       | Residue              | Dist Å |
|--------|----------------------|-----------|--------------|----------------------|--------|
| FPP    |                      |           | Benzophenone |                      |        |
| O2A    | NZ (K164, $\alpha$ ) | 2.9       | O2A          | NZ (K164, $\alpha$ ) | 2.8    |
| O1A    | NZ (K164, $\alpha$ ) | 3.3       | O1A          | NZ (K164, $\alpha$ ) | 3.0    |
| O1A    | NZ (K294, $\beta$ )  | 3.3       |              |                      |        |
| O1B    | NZ (K294, $\beta$ )  | 2.8       | O1B          | NE2 (H248, $\beta$ ) | 2.7    |
| O2B    | NZ (K294, $\beta$ )  | 3.8       | O1B          | OH (Y300, $\beta$ )  | 2.7    |
| O2B    | NH2 (R291, $\beta$ ) | 3.2       |              |                      |        |
| O2B    | NE2 (H248, $\beta$ ) | 3.0       |              |                      |        |
| O3B    | NE2 (H248, $\beta$ ) | 4.0       | O3B          | NZ (K294, $\beta$ )  | 2.5    |
| O3B    | OH (Y300, $\beta$ )  | 2.7       | O3B          | NH2 (R291, $\beta$ ) | 3.7    |
| O3A    | OH (Y300, $\beta$ )  | 3.8       |              |                      |        |
| O1A    | NH2 (R291, $\beta$ ) | 2.9       |              |                      |        |
| O2B    | NE (R291, $\beta$ )  | 2.8       |              |                      |        |

**EcFPPSase**

| Ligand | Residue    | Dist in Å | Ligand       | Residue    | Dist Å |
|--------|------------|-----------|--------------|------------|--------|
| FPP    |            |           | Benzophenone |            |        |
| O8     | NZ (K258)  | 2.6       | O9           | NH2 (R116) | 2.1    |
| O6     | NZ (K258)  | 3.1       | O8           | NZ (K258)  | 2.6    |
| O9     | NZ (K66)   | 2.6       | O6           | NZ (K66)   | 3.9    |
| O10    | NZ (K66)   | 3.5       | O10          | NZ (K66)   | 3.6    |
| OUKN1  | NZ (K66)   | 2.6       | O12          | NZ (K66)   | 2.4    |
| OUKN1  | N (K66)    | 3.5       | O12          | N (K66)    | 3.6    |
| O12    | NH2 (R117) | 3.1       | O14          | NE (R117)  | 2.6    |
| O12    | NE (R117)  | 2.6       |              |            |        |
| O14    | NE (R117)  | 4.0       |              |            |        |

**StSTSase**

| Ligand | Residue     | Dist in Å | Ligand       | Residue     | Dist Å |
|--------|-------------|-----------|--------------|-------------|--------|
| FPP    |             |           | Benzophenone |             |        |
| O3     | NH2 (R173)  | 3.4       | O2           | ND2 (N219)  | 3.0    |
| O1     | NH2 (R173)  | 3.5       | O4           | MG701 (Mg1) | 1.8    |
| O1     | NH1 (R173)  | 3.0       | O            | MG701 (Mg1) | 2.6    |
| O1     | ND2 (N219)  | 3.9       | O2           | MG701 (Mg1) | 3.7    |
| O      | ND2 (N219)) | 3.5       | O5           | MG702 (Mg2) | 2.0    |
| O2     | MG702 (Mg2) | 2.0       | O            | MG702 (Mg2) | 3.3    |
| O      | MG702 (Mg2) | 2.8       | O3           | MG702 (Mg2) | 2.0    |
| O6     | MG702 (Mg2) | 1.8       | O1           | MG702 (Mg2) | 3.1    |
| O4     | MG702 (Mg2) | 3.8       |              |             |        |
| O5     | MG701 (Mg1) | 1.8       |              |             |        |
| O      | MG701 (Mg1) | 3.0       |              |             |        |
| O1     | MG701 (Mg1) | 3.6       |              |             |        |
